# Supplementary material for: Labeled microRNA pull-down assay system: an experimental approach for high-throughput identification of microRNA-target mRNAs
Source: PubMed Central journal article supplement — Nucleic Acids Res. 2009 May 6;37(10):e77. doi: 10.1093/nar/gkp274 (PMC2691847; doi:10.1093/nar/gkp274), 2009-05-06
Supplement: gkp274_1.pdf [file gkp274_1.pdf]

**Supplementary Figure 1.** Western blot analysis of the presence of Dicer in the cell extract. Total proteins extracted from the zebrafish embryos (Cell extract) and the cell extract in which Dicer was depleted by immunoprecipitation of anti-Dicer antiserum (Dicer-) were separated on a 6% polyacrylamide gel. After sodium dodecyl sulfate-polyacrylamide gel electrophoresis, Western blot analysis was performed by using anti-Dicer (Santa Cruz). Dicer was present in the cell extract and in the dissolved immunoprecipitate (IP), whereas Dicer was completely depleted in the cell extract after anti-Dicer immunoprecipitation was treated.

**Supplementary Figure 2.** Western blot analysis of the presence of Ago protein. Total proteins were obtained from the affinity purification of DIG-tagged miR-1 (miR-1), DIG-tagged mutated miR-1 (Mutated miR-1) and DIG-tagged mutated let-7 (Mutated let-7) from cell extracts and separated on the SDS-PAGE. The anti-Ago antibody was used to perform Western blot analysis. The immuno-positive band against Ago was shown on all the extracts from miR-1, mutated miR-1 and mutated let-7.

**Supplementary Figure 3.** The matching sequences between *miR-1* and its target mRNA of zebrafish *hand2*. The mir-blast software was used to analyze the alignment between miR-1 and zebrafish *hand2*. Results indicate that there is a binding site located at the 3' untranslated region of *hand2*, where the conserved residues match miRNA sequences (indicated in red).

**Supplementary Table 2.** Microarray data for top 302 mRNAs from miR-1 pull-down experiments and the corresponding detection values for miR-1 MUT, showing Probe ID, common name and normalized detection values from two experiments.

*Cell extract*

*Cell extract (Dicer-)*

*IP: Dicer*

250 kDa →

130 kDa →

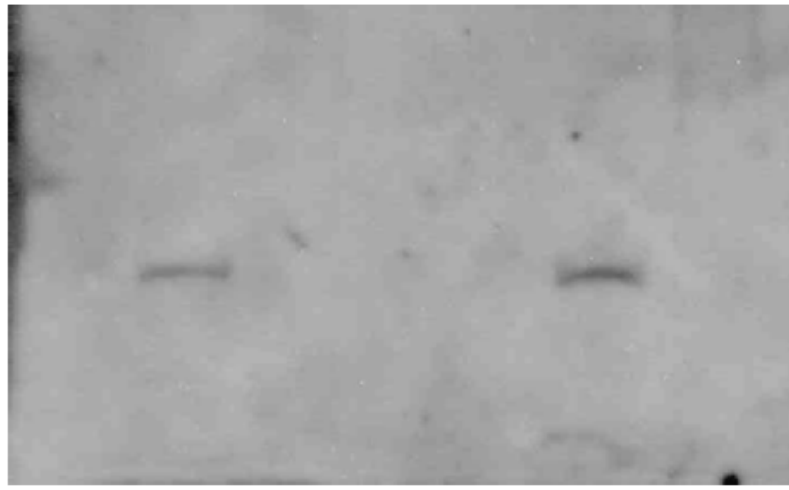

← Dicer

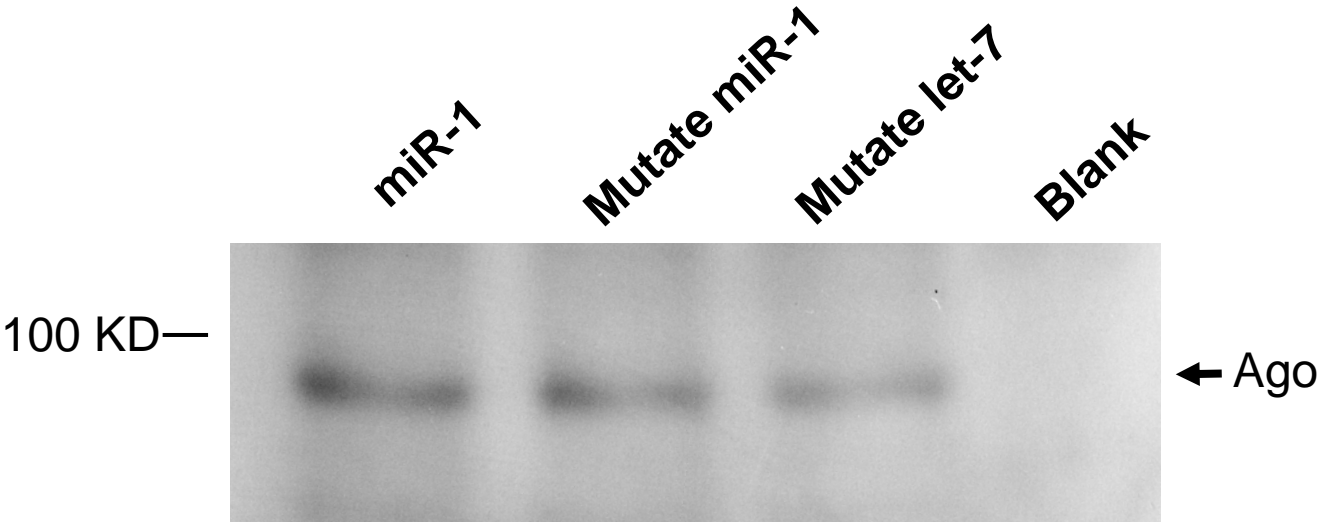

miR-1:                   AUGUAUGAAGAAU-----GUAAGGU  
                          ||  |||||                  |||||  
hand2 3'UTR: GACAUUAGAUUUUGAGGAAAACCAUCCAUUU

Table S1 Primer sequences

| Name              | oligonucleotide sequences (5'→3')            | description      |
|-------------------|----------------------------------------------|------------------|
| Cel-Pre-lin4-1F   | ATGCTTCCGGCTGTTCCCTGAGACCTCAAGTGTGAGTG       | nt 499- 538      |
| Cel-Pre-lin4-2F   | AAGTGTGAGTGACTATTGATGCTTCACACCTGGGCTCT       | nt 527-566       |
| Cel-Pre-lin4-1R   | ATCTGCTCAAACCGTCCTGGTACCCGGAGAGCCCAGGTG      | nt 592-555       |
| Cel-Pre-let7-1F   | TACTGTGGATCCGGTGAGGTAGTAGTTGTATAGTTT         | nt 1747-1789     |
| Cel-Pre-let7-2F   | TGTATAGTTTGAATATTACCACCGGTGAACTATGCAAT       | nt 1775-1814     |
| Cel-Pre-let7-1R   | TCGAAGAGTTCTGTCTCCGGTAAGGTAGAAAATTGCAA       | nt 1845-1806     |
| Cel-Pre-let7M-1F  | TACTGTGGATCCGGTGAGGTAGAACGAAGTATAGTTT        |                  |
| Cel-Pre-let7M-2F  | AGTATAGTTTGAATATTACCACCGGTGAACTATGCAAT       |                  |
| Cel-Pre-let7M-1R  | TCGAAGAGTTCTGTCTCCGGTAAGGTAGAAAATTGCATA      |                  |
| ZF-Pre-let7-1F    | GAGGTAGTAGGTTGTATAGTTTTAGGGTCACACCCACC       | nt 143959-143920 |
| ZF-Pre-let7-2F    | TAGTTTTAGGGTCACACCCACCACTGGGAGATAACTATA      | nt 143942-143903 |
| ZF-Pre-let7-1R    | GGGTGGTGACCCTCTATTGATATGTTAGATGACAGAAAG      | nt143881-143910  |
| ZF-Pre-miR1-1F    | GCCCATATATCCCGCTGGTAGACATACTTCTTTATATG       | nt 166173-166134 |
| ZF-Pre-miR1-1R    | TTTATATGCCCATATGAACAAGAGCAGCTATG             | nt 166141-166102 |
| ZF-Pre-miR1-1R    | TGGGATACATACTTCTTTACATTCCATAG                | nt 166110-166071 |
| ZF-Pre-miR1-2R    | GCCCCGTTTTTCTCTCACCTGGGATACA                 | nt 166068-166080 |
| ZF-Pre-miR1M-2F   | TTTATATGCCCATATGAACAAGAGCAGCTAT <sub>c</sub> |                  |
| ZF-Pre-miR1M-1R   | TGGGATACATACTTCTTTAC <sub>ta</sub> TgCATAG   |                  |
| Cel-lin41F        | GATCCCTTGATCCTTCTTGC                         | nt 3519-3499     |
| Cel-lin41R        | CGGAGCCATATGAATGGATG                         | nt 3920-3911     |
| Cel-Hbl-1F        | GGACGTCCTCGTTAAGGAAAC                        | nt 3079-3099     |
| Cel-Hbl-1R        | ATCCCGAAGTTAATAAGAGG                         | nt 3540-3521     |
| Cel-lin14F        | CAATGTTCGAAATCCCCGTTT                        | nt 1337-1356     |
| Cel-lin14R        | GCTTCAGGCGATACTGTTC                          | nt 1833-1812     |
| Cel-lin28F        | CCTCTGATGAATAGAATCACTC                       | nt 696-716       |
| Cel-lin28R        | GATGATTCTATTCATCAGAGG                        | nt 991-1010      |
| Cel-ef2F          | GTCAACTTCACGGTCGATG                          | nt 34-52         |
| Cel-ef2R          | TCCGAGCTTCTCAACAAGAGC                        | nt 972-952       |
| ZF-lin41F         | ATAAGACTGCTGCAAGCTGAGAG                      | nt 1-23          |
| ZF-lin41R         | TCAGGGATATAACTTGCGTTC                        | nt 379-358       |
| ZF-hand2-3' UTR-F | GGCCATCTGAACTATTTTATG                        | nt1141-1162      |
| ZF-hand2-3' UTR-R | GTTTGTGTCTTCGGACGGAAG                        | nt1565-1585      |
| ZF-β-actinF       | GGCACGAGAGATCTTCACTCCC                       | nt 1-22          |
| ZF-β-actinR       | CCGATCCAGACGGAGTATTTGCG                      | nt 1078-1056     |
| TS primer         | AAGCAGTGGTAACAACGCAGAGTACGCGGG               |                  |

nucleotide (nt)



**Table S2** Microarray analysis presented by LAMIPAS for zebrafish miR-1 probe

| <b>Probe ID</b> | <b>WT Raw<br/>Signal</b> | <b>MT Raw<br/>Signal</b> | <b>normalized<br/>Ratio<br/>(WT/MT)</b> | <b>Common Name</b> |
|-----------------|--------------------------|--------------------------|-----------------------------------------|--------------------|
| A_15_P195461    | 112737.6                 | 6.744765                 | 53,163                                  | hand2              |
| A_15_P139791    | 211485                   | 30.94004                 | 21,741                                  | hsp70-4            |
| A_15_P138581    | 261974.2                 | 48.39565                 | 17,217                                  | NCN                |
| A_15_P191111    | 4596.214                 | 6.138789                 | 2,381                                   | epn4               |
| A_15_P584272    | 3809.017                 | 7.05483                  | 1,717                                   |                    |
| A_15_P580728    | 2111.8                   | 6.142564                 | 1,093                                   |                    |
| A_15_P149826    | 3791.559                 | 12.11153                 | 995.7                                   | nedd4a             |
| A_15_P546627    | 2045.285                 | 6.998787                 | 929.5                                   | LOC798015          |
| A_15_P426210    | 23029.81                 | 81.32103                 | 900.7                                   |                    |
| A_15_P215281    | 1570.749                 | 6.226203                 | 802.4                                   | LOC553494          |
| A_15_P169516    | 10298.77                 | 41.15472                 | 795.9                                   | fb61d02            |
| A_15_P584142    | 1562.155                 | 6.796371                 | 731.1                                   |                    |
| A_15_P100163    | 1729.736                 | 7.897229                 | 696.7                                   | zgc:103521         |
| A_15_P299911    | 5867.391                 | 27.6957                  | 673.8                                   |                    |
| A_15_P131451    | 5017.448                 | 25.20416                 | 633.2                                   | isl2               |
| A_15_P610062    | 6524.688                 | 36.26974                 | 572.2                                   |                    |
| A_15_P201236    | 1282.604                 | 7.152338                 | 570.4                                   | entgLOC571027      |
| A_15_P515886    | 1118.904                 | 6.567261                 | 541.9                                   |                    |
| A_15_P460980    | 1062.729                 | 6.242546                 | 541.5                                   | LOC559212          |
| A_15_P575367    | 9828.417                 | 50.58489                 | 511.7                                   | suclg1             |
| A_15_P578547    | 1873.737                 | 11.67252                 | 510.6                                   | LOC561142          |
| A_15_P241486    | 11963.17                 | 76.02713                 | 500.5                                   | LOC100000804       |
| A_15_P612242    | 930.1458                 | 6.207293                 | 476.6                                   | LOC100000556       |
| A_15_P596992    | 892.7289                 | 6.034088                 | 470.6                                   | zgc:158387         |
| A_15_P177256    | 1005.584                 | 7.138385                 | 448.1                                   | nr5a5              |
| A_15_P444815    | 1812.052                 | 13.28376                 | 433.9                                   |                    |
| A_15_P382130    | 3676.944                 | 29.20111                 | 400.5                                   | zgc:110313         |
| A_15_P289026    | 778.8423                 | 6.482828                 | 382.1                                   | LOC565834          |
| A_15_P371420    | 4617.821                 | 39.87967                 | 368.3                                   |                    |
| A_15_P452770    | 618.9743                 | 5.653852                 | 348.2                                   |                    |
| A_15_P498812    | 2673.045                 | 24.68297                 | 344.4                                   | LOC100007541       |
| A_15_P161386    | 986.3221                 | 9.318299                 | 336.7                                   | pvalb3b            |
| A_15_P119814    | 592.9164                 | 5.715904                 | 329.9                                   | zgc:77659          |
| A_15_P590252    | 799.3277                 | 7.749044                 | 328.1                                   |                    |



|              |          |          |       |                 |
|--------------|----------|----------|-------|-----------------|
| A_15_P289151 | 709.4306 | 7.084238 | 318.5 | LOC792877       |
| A_15_P313551 | 1536.355 | 15.41215 | 317.1 |                 |
| A_15_P391435 | 739.4811 | 7.426985 | 316.7 |                 |
| A_15_P107534 | 3121.57  | 33.96794 | 292.3 | zgc:103443      |
| A_15_P141466 | 3573.355 | 39.26662 | 289.4 | fut9            |
| A_15_P111524 | 1601.287 | 17.80825 | 286   | olfr2.8         |
| A_15_P369610 | 6460.729 | 72.31904 | 284.1 |                 |
| A_15_P449735 | 3445.134 | 39.18846 | 279.6 | LOC799448       |
| A_15_P551227 | 2813.233 | 32.66784 | 273.9 | si:dkey-76p14.2 |
| A_15_P554632 | 1194.867 | 14.34012 | 265   | LOC798934       |
| A_15_P203841 | 512.8302 | 6.196714 | 263.2 |                 |
| A_15_P118156 | 1991.086 | 24.69777 | 256.4 | zgc:136280      |
| A_15_P307921 | 812.4374 | 10.16774 | 254.1 |                 |
| A_15_P215911 | 4056.863 | 52.08939 | 247.7 | LOC563327       |
| A_15_P388960 | 2072.211 | 26.67683 | 247.1 | LOC793696       |
| A_15_P517182 | 580.192  | 7.620772 | 242.1 | wu:fc06h10      |
| A_15_P441985 | 2698.655 | 35.57912 | 241.2 | LOC100000720    |
| A_15_P567317 | 4314.466 | 57.37854 | 239.2 |                 |
| A_15_P559122 | 557.1886 | 7.759026 | 228.4 |                 |
| A_15_P462165 | 837.5907 | 11.7026  | 227.6 | LOC100008273    |
| A_15_P391225 | 522.4305 | 7.29933  | 227.6 | LOC796852       |
| A_15_P174911 | 4193.81  | 58.70719 | 227.2 | lect2           |
| A_15_P107891 | 609.3993 | 8.897997 | 217.8 | LOC558924       |
| A_15_P524512 | 533.3239 | 7.940948 | 213.6 |                 |
| A_15_P232661 | 667.9069 | 11.35441 | 187.1 |                 |
| A_15_P409800 | 1090.465 | 18.81411 | 184.3 | LOC799775       |
| A_15_P269656 | 542.4277 | 9.595135 | 179.8 | entg LOC566073  |
| A_15_P589087 | 4451.406 | 80.98185 | 174.8 |                 |
| A_15_P119253 | 923.6432 | 16.81963 | 174.7 | wu:fe01a10      |
| A_15_P328421 | 4117.614 | 76.64507 | 170.9 |                 |
| A_15_P397705 | 2254.214 | 43.74457 | 163.9 | LOC100005987    |
| A_15_P490937 | 737.7007 | 14.31151 | 163.9 | LOC100004123    |
| A_15_P132286 | 1011.515 | 21.19531 | 151.8 | zgc:91947       |
| A_15_P461670 | 1221.573 | 27.42701 | 141.7 |                 |
| A_15_P398975 | 2305.448 | 51.79372 | 141.6 | LOC556262       |
| A_15_P452315 | 1848.454 | 43.65344 | 134.7 | entg zgc:171516 |
| A_15_P208331 | 599.6405 | 14.2022  | 134.3 | pop1; zgc:86887 |
| A_15_P503742 | 608.9254 | 15.71751 | 123.2 | zgc:66008       |

|              |          |          |       |                 |
|--------------|----------|----------|-------|-----------------|
| A_15_P156261 | 783.5289 | 20.29741 | 122.8 |                 |
| A_15_P435080 | 842.4722 | 21.95199 | 122.1 | entg LOC556826  |
| A_15_P146286 | 1730.875 | 45.75627 | 120.3 | parvalbumin 4   |
| A_15_P171917 | 606.4738 | 16.95807 | 113.7 | z-28; hoxd9     |
| A_15_P408365 | 1223.904 | 35.39129 | 110   | MGC64051        |
| A_15_P480855 | 547.3127 | 16.49761 | 105.5 |                 |
| A_15_P553017 | 1695.573 | 52.46911 | 102.8 |                 |
| A_15_P268401 | 1051.189 | 33.17826 | 100.8 |                 |
| A_15_P516407 | 654.3865 | 20.76135 | 100.3 | wu:fc02a12      |
| A_15_P565662 | 625.1946 | 19.90524 | 99.9  | zgc:92808       |
| A_15_P229006 | 551.7773 | 18.43202 | 95.21 | zgc:76878       |
| A_15_P242391 | 657.9025 | 22.00142 | 95.11 | LOC796345       |
| A_15_P243276 | 669.9573 | 22.63853 | 94.13 | si:dkey-94n12.2 |
| A_15_P238026 | 2305.476 | 78.43646 | 93.49 |                 |
| A_15_P193851 | 1723.051 | 58.69859 | 93.36 | MGC110031       |
| A_15_P551847 | 774.0115 | 26.37196 | 93.35 |                 |
| A_15_P536627 | 702.8545 | 24.03226 | 93.02 | entg LOC571844  |
| A_15_P106795 | 1454.765 | 50.44018 | 91.73 | zgc:112439      |
| A_15_P362343 | 899.0071 | 31.45905 | 90.89 |                 |
| A_15_P251921 | 1155.918 | 42.25878 | 87    |                 |
| A_15_P552352 | 2142.268 | 83.01441 | 82.08 |                 |
| A_15_P142506 | 1302.95  | 51.75174 | 80.08 | zgc:64086       |
| A_15_P133961 | 914.9298 | 36.76261 | 79.16 | AA-NAT          |
| A_15_P587652 | 5128.692 | 206.7739 | 78.89 | entg zgc:110158 |
| A_15_P131501 | 523.6769 | 22.14466 | 75.22 | wt1; zwt1       |
| A_15_P316776 | 1128.656 | 48.07121 | 74.68 |                 |
| A_15_P100468 | 806.0082 | 34.5574  | 74.18 | zgc:85935       |
| A_15_P160741 | 1179.386 | 51.95231 | 72.2  | zgc:110576      |
| A_15_P156016 | 537.6212 | 24.16306 | 70.77 | LOC100003810    |
| A_15_P188286 | 3601.382 | 167.5536 | 68.36 | zgc:56524       |
| A_15_P161631 | 1330.908 | 62.44604 | 67.79 | zgc:55577       |
| A_15_P610562 | 1081.304 | 53.40516 | 64.4  | LOC100000391    |
| A_15_P162711 | 1643.503 | 82.16133 | 63.62 | sdca4           |
| A_15_P393815 | 503.1127 | 25.31691 | 63.21 |                 |
| A_15_P171126 | 732.0505 | 37.55036 | 62.01 | si:dkey-12h9.2  |
| A_15_P196596 | 1654.551 | 85.06415 | 61.86 | zgc:101085      |
| A_15_P367530 | 3033.936 | 156.2681 | 61.75 | Tal; MGC56232   |
| A_15_P121060 | 840.082  | 44.17083 | 60.49 | zgc:103711      |

|              |          |          |       |                  |
|--------------|----------|----------|-------|------------------|
| A_15_P269676 | 1532.97  | 80.84517 | 60.31 | LOC571255        |
| A_15_P443505 | 742.6913 | 40.76455 | 57.95 | entg LOC571836   |
| A_15_P245701 | 710.6388 | 39.23662 | 57.61 |                  |
| A_15_P120385 | 7966.934 | 447.5265 | 56.62 | fj42d12          |
| A_15_P181056 | 2995.226 | 172.6526 | 55.18 | entg LOC407683   |
| A_15_P483075 | 994.0124 | 62.31622 | 50.73 | entg LOC559281   |
| A_15_P114680 | 1117.076 | 71.32021 | 49.82 | zgc:110067       |
| A_15_P454255 | 751.6255 | 48.1236  | 49.68 |                  |
| A_15_P248956 | 1508.941 | 98.18625 | 48.88 |                  |
| A_15_P297541 | 871.2495 | 56.94965 | 48.66 | cacnb4b          |
| A_15_P323016 | 530.3931 | 34.66862 | 48.66 | entg wu:fj51h02  |
| A_15_P370030 | 639.2548 | 41.96791 | 48.45 |                  |
| A_15_P443140 | 518.5936 | 34.0592  | 48.43 | entg LOC558116   |
| A_15_P554637 | 800.5389 | 52.59349 | 48.41 |                  |
| A_15_P203801 | 915.4548 | 60.38067 | 48.22 | MGC123214        |
| A_15_P362115 | 592.0196 | 39.13732 | 48.11 |                  |
| A_15_P131006 | 1561.26  | 104.3067 | 47.61 | zgc:77257        |
| A_15_P315801 | 1260.746 | 86.4956  | 46.36 |                  |
| A_15_P310786 | 500.994  | 36.89783 | 43.19 |                  |
| A_15_P588032 | 802.5982 | 59.82561 | 42.67 |                  |
| A_15_P175296 | 1660.124 | 124.6198 | 42.37 | capsl            |
| A_15_P259631 | 584.3059 | 44.0435  | 42.2  | MGC65997         |
| A_15_P260641 | 1459.602 | 110.3462 | 42.07 |                  |
| A_15_P152236 | 615.6214 | 46.53729 | 42.07 | zgc:113041       |
| A_15_P583412 | 79159.22 | 5989.548 | 42.04 |                  |
| A_15_P204506 | 644.9083 | 48.9121  | 41.94 | entg LOC567631   |
| A_15_P189306 | 567.3779 | 45.86764 | 39.34 |                  |
| A_15_P452385 | 543.267  | 44.4501  | 38.87 | LOC563791        |
| A_15_P222841 | 4576.89  | 384.8388 | 37.83 |                  |
| A_15_P497907 | 910.4883 | 77.30328 | 37.46 | LOC794516        |
| A_15_P244111 | 569.9094 | 48.38465 | 37.46 |                  |
| A_15_P219471 | 1538.885 | 131.9506 | 37.09 | zgc:162249       |
| A_15_P409970 | 642.9407 | 56.09779 | 36.45 |                  |
| A_15_P197261 | 1157.826 | 101.2058 | 36.39 |                  |
| A_15_P369465 | 630.9089 | 58.01611 | 34.59 | entg LOC558325   |
| A_15_P160121 | 822.113  | 77.18916 | 33.88 |                  |
| A_15_P388850 | 127.5211 | 12.324   | 32.7  | Sars             |
| A_15_P109869 | 540.4793 | 56.31104 | 30.53 | si:ch211-105n9.1 |

|              |          |          |       |                                                       |
|--------------|----------|----------|-------|-------------------------------------------------------|
|              |          |          |       | cb235; fb39c11;<br>fc51e12; zeh1207;                  |
| A_15_P206546 | 746.6943 | 79.83739 | 29.75 | sb:cb235;<br>hm:zeh1207;<br>wu:fb39c11;<br>wu:fc51e12 |
| A_15_P412475 | 812.7591 | 87.81868 | 29.44 | LOC100007149                                          |
| A_15_P533622 | 552.2031 | 60.08588 | 29.23 | LOC570248                                             |
| A_15_P241356 | 1101.959 | 123.0269 | 28.49 | LOC797088                                             |
| A_15_P404700 | 867.9293 | 105.0054 | 26.29 |                                                       |
| A_15_P467290 | 4894.407 | 597.1747 | 26.07 |                                                       |
| A_15_P428820 | 770.5859 | 94.11853 | 26.04 |                                                       |
| A_15_P104288 | 513.2694 | 62.95544 | 25.93 | actr3                                                 |
| A_15_P597697 | 592.7314 | 74.22234 | 25.4  | LOC797715                                             |
| A_15_P518027 | 543.607  | 68.8767  | 25.1  | LOC100008150                                          |
| A_15_P297186 | 531.7836 | 68.71512 | 24.61 | LOC798944                                             |
| A_15_P195576 | 512.0662 | 69.88439 | 23.31 | MGC55975;<br>zgc:55975                                |
| A_15_P187996 | 870.3597 | 120.4484 | 22.98 |                                                       |
| A_15_P413945 | 607.4908 | 85.56991 | 22.58 | entg aldh5a1                                          |
| A_15_P139451 | 1455.539 | 209.3156 | 22.12 | zgc:110852                                            |
| A_15_P330646 | 713.3187 | 103.0937 | 22.01 |                                                       |
| A_15_P144191 | 692.5272 | 101.5078 | 21.7  | entg LOC569977                                        |
| A_15_P404905 | 6859.033 | 1006.627 | 21.67 |                                                       |
| A_15_P248611 | 818.8273 | 121.3037 | 21.47 |                                                       |
| A_15_P333584 | 2131.703 | 316.206  | 21.44 | zgc:158463                                            |
| A_15_P583952 | 505.873  | 75.73867 | 21.24 |                                                       |
| A_15_P451105 | 3140.786 | 473.0198 | 21.12 |                                                       |
| A_15_P454660 | 514.6307 | 77.67033 | 21.07 |                                                       |
| A_15_P116336 | 503.11   | 79.61873 | 20.1  |                                                       |
| A_15_P578087 | 887.4809 | 144.3246 | 19.56 |                                                       |
| A_15_P114305 | 630.0089 | 102.5846 | 19.53 |                                                       |
| A_15_P401690 | 614.4205 | 100.5291 | 19.44 | LOC100005868                                          |
| A_15_P462675 | 829.6454 | 146.8089 | 17.97 |                                                       |
| A_15_P451335 | 1043.889 | 187.3899 | 17.72 |                                                       |
| A_15_P369685 | 654.9993 | 121.236  | 17.18 |                                                       |
| A_15_P507047 | 1028.331 | 190.6577 | 17.15 | zgc:158313                                            |
| A_15_P266491 | 591.4842 | 111.5324 | 16.87 | tpma                                                  |

|              |          |          |       |                                                            |
|--------------|----------|----------|-------|------------------------------------------------------------|
| A_15_P372650 | 2075.064 | 394.322  | 16.74 |                                                            |
| A_15_P385280 | 601.1452 | 115.8459 | 16.5  |                                                            |
| A_15_P217776 | 2449.408 | 482.1613 | 16.16 | MGC153462                                                  |
| A_15_P200281 | 732.6837 | 145.8674 | 15.98 |                                                            |
| A_15_P404660 | 908.9371 | 185.0196 | 15.63 | LOC100005890                                               |
| A_15_P401905 | 1263.177 | 263.3439 | 15.26 | LOC560678                                                  |
| A_15_P369775 | 601.8929 | 126.7054 | 15.11 |                                                            |
| A_15_P597322 | 616.4723 | 130.375  | 15.04 |                                                            |
| A_15_P546302 | 1391.695 | 296.5127 | 14.93 | LOC100000041                                               |
| A_15_P119642 | 1580.127 | 339.9044 | 14.79 |                                                            |
| A_15_P336640 | 3475.614 | 762.124  | 14.5  | setd5                                                      |
| A_15_P220321 | 551.3976 | 121.8557 | 14.39 |                                                            |
| A_15_P394305 | 1191.392 | 279.5276 | 13.56 | LOC570868                                                  |
| A_15_P461970 | 2970.575 | 698.5419 | 13.53 |                                                            |
| A_15_P484155 | 593.4229 | 142.3012 | 13.26 | col4a1; fc02g11;<br>wu:fc02g11                             |
| A_15_P279816 | 1712.826 | 416.3408 | 13.09 | LOC557744                                                  |
| A_15_P402390 | 730.789  | 178.4655 | 13.02 | e(r); zgc:86761                                            |
| A_15_P433400 | 529.44   | 129.5557 | 13    | LOC556563                                                  |
| A_15_P204106 | 637.3677 | 156.1124 | 12.99 | entg hdac9b                                                |
| A_15_P144301 | 2025.582 | 506.7237 | 12.71 | entg LOC567842                                             |
| A_15_P318451 | 1483.493 | 385.6631 | 12.23 |                                                            |
| A_15_P329921 | 1258.94  | 333.524  | 12.01 |                                                            |
| A_15_P469210 | 685.2981 | 181.7429 | 11.99 |                                                            |
| A_15_P526407 | 536.4605 | 148.1323 | 11.52 |                                                            |
| A_15_P516752 | 519.7576 | 145.685  | 11.35 | LOC561758                                                  |
| A_15_P313511 | 2532.776 | 711.9219 | 11.32 |                                                            |
| A_15_P113380 | 1604.906 | 457.3489 | 11.16 |                                                            |
| A_15_P141861 | 606.5813 | 174.0033 | 11.09 | Shfdg1; fb55c02;<br>zgc:56203;<br>zgc:85901;<br>wu:fb55c02 |
| A_15_P277501 | 1432.457 | 414.524  | 10.99 | zgc:110070                                                 |
| A_15_P308106 | 1220.293 | 364.9511 | 10.64 |                                                            |
| A_15_P247981 | 979.0344 | 303.4516 | 10.26 |                                                            |
| A_15_P576647 | 533.9608 | 169.0651 | 10.05 |                                                            |
| A_15_P113908 | 700.7125 | 226.8046 | 9.827 |                                                            |
| A_15_P575042 | 1621.177 | 541.1687 | 9.528 |                                                            |

|              |          |          |       |                                              |
|--------------|----------|----------|-------|----------------------------------------------|
| A_15_P141781 | 692.1289 | 236.1989 | 9.32  | MGC136325                                    |
| A_15_P117663 | 781.9702 | 268.0876 | 9.277 | entg CH211-198N5.11                          |
| A_15_P238216 | 623.0198 | 218.012  | 9.089 |                                              |
| A_15_P161006 | 7578.78  | 2738.865 | 8.801 | MGC153954                                    |
| A_15_P291361 | 1536.189 | 582.9856 | 8.381 | entg LOC792944                               |
| A_15_P115713 | 530.9062 | 202.0089 | 8.359 | entg LOC563577                               |
| A_15_P326866 | 2537.123 | 978.8559 | 8.244 |                                              |
| A_15_P350755 | 920.6272 | 361.8256 | 8.093 |                                              |
| A_15_P443160 | 1002.47  | 407.3737 | 7.827 | LOC795217                                    |
| A_15_P253856 | 1628.621 | 662.8839 | 7.814 |                                              |
|              |          |          |       | odc; fc54f04; fi06d08;                       |
| A_15_P170821 | 2170.17  | 910.7068 | 7.579 | CHUNP6922;<br>wu:fc54f04;<br>wu:fi06d08      |
| A_15_P547182 | 585.298  | 253.2537 | 7.351 |                                              |
| A_15_P583252 | 618.2911 | 271.2504 | 7.25  |                                              |
| A_15_P556347 | 610.1992 | 269.8315 | 7.193 | entg LOC568122                               |
| A_15_P523692 | 625.6119 | 279.2233 | 7.126 |                                              |
| A_15_P172471 | 626.7649 | 281.8995 | 7.072 | MGC123321                                    |
| A_15_P118768 | 740.0267 | 346.4795 | 6.793 | MGC55887;<br>zgc:55887                       |
| A_15_P555972 | 984.0913 | 471.4651 | 6.639 | LOC572258                                    |
| A_15_P439095 | 614.5045 | 294.9222 | 6.627 | entg KIAA0261                                |
| A_15_P351555 | 1085.583 | 557.9819 | 6.188 |                                              |
| A_15_P215991 | 960.147  | 494.1694 | 6.18  | tri; stbm; vang<br>fb99h10; tdsbc_2c6;       |
| A_15_P102849 | 732.1453 | 383.7244 | 6.069 | wu:fb99h10;<br>ik:tdsbc_2c6;<br>xx:tdsbc_2c6 |
| A_15_P282626 | 1807.671 | 974.9644 | 5.897 |                                              |
| A_15_P577747 | 4344.616 | 2587.896 | 5.34  |                                              |
| A_15_P446415 | 973.438  | 610.388  | 5.072 | zgc:103631                                   |
| A_15_P462330 | 1194.541 | 787.5543 | 4.824 | LOC100007650                                 |
| A_15_P519412 | 502.3961 | 343.1029 | 4.657 |                                              |
| A_15_P262221 | 506.4832 | 355.7664 | 4.528 | wu:fk52g02                                   |
| A_15_P358625 | 2197.587 | 1605.579 | 4.353 |                                              |
| A_15_P597267 | 535.0222 | 410.6529 | 4.144 | c20orf149                                    |
| A_15_P309326 | 574.0817 | 441.9062 | 4.132 |                                              |

|              |          |          |       |                                                 |
|--------------|----------|----------|-------|-------------------------------------------------|
| A_15_P464870 | 622.6881 | 490.5413 | 4.037 |                                                 |
| A_15_P376420 | 571.1636 | 473.4774 | 3.837 |                                                 |
| A_15_P114676 | 1363.153 | 1156.893 | 3.748 |                                                 |
| A_15_P152906 | 1691.816 | 1441.074 | 3.734 | zgc:158280                                      |
| A_15_P430240 | 699.0459 | 612.3196 | 3.631 |                                                 |
| A_15_P564517 | 1232.146 | 1325.136 | 2.957 | entg COX1                                       |
| A_15_P307641 | 1402.378 | 1514.03  | 2.946 |                                                 |
| A_15_P111288 | 783.2648 | 877.2008 | 2.84  | sb:cb794; id:ibd3393                            |
| A_15_P476815 | 591.7214 | 695.6127 | 2.706 |                                                 |
| A_15_P536027 | 556.5851 | 654.8063 | 2.704 |                                                 |
| A_15_P520142 | 696.7422 | 822.1862 | 2.695 | sb:cb597                                        |
| A_15_P237256 | 716.7628 | 868.8485 | 2.624 |                                                 |
| A_15_P609917 | 833.0049 | 1021.274 | 2.594 |                                                 |
| A_15_P400345 | 722.0431 | 963.5673 | 2.383 | LOC796736                                       |
| A_15_P141801 | 519.9757 | 704.8384 | 2.346 | MGC114157                                       |
| A_15_P409225 | 4201.538 | 5753.578 | 2.323 | LOC794331                                       |
| A_15_P286756 | 1593.408 | 2330.464 | 2.175 | Ptk; tec; ZFPtk                                 |
| A_15_P386375 | 502.4079 | 753.0919 | 2.122 |                                                 |
| A_15_P283386 | 796.5646 | 1200.733 | 2.11  |                                                 |
| A_15_P595322 | 642.8374 | 1111.424 | 1.84  |                                                 |
| A_15_P591817 | 1408.812 | 2488.809 | 1.8   | SH3BGRL;<br>MGC64130                            |
| A_15_P101439 | 1023.596 | 1816.089 | 1.793 | zgc:136505                                      |
| A_15_P560162 | 570.0735 | 1041.125 | 1.742 |                                                 |
| A_15_P262961 | 601.594  | 1132.377 | 1.69  |                                                 |
| A_15_P106403 | 1461.7   | 2754.554 | 1.688 | cb326; fb36c12;<br>wu:fb36c12<br>cTnT; zeh0954; |
| A_15_P192466 | 93019.07 | 176096   | 1.68  | MGC123151;<br>hm:zeh0954<br>cTnT; zeh0954;      |
| A_15_P260616 | 30446.78 | 57669.35 | 1.679 | MGC123151;<br>hm:zeh0954                        |
| A_15_P283861 | 551.9881 | 1090.878 | 1.609 |                                                 |
| A_15_P255041 | 535.6234 | 1060.366 | 1.607 |                                                 |
| A_15_P428615 | 738.808  | 1504.818 | 1.562 |                                                 |
| A_15_P193236 | 544.8239 | 1143.552 | 1.515 | zeh0819; MGC77664;<br>zgc:73129;                |

zgc:77664;

hm:zeh0819

|                 |           |           |       |               |
|-----------------|-----------|-----------|-------|---------------|
| A_15_P427195    | 1793.23   | 3792.965  | 1.504 |               |
| GE_BrightCorner | 2663.7874 | 5719.4614 | 1.481 |               |
| A_15_P411085    | 541.1392  | 1174.168  | 1.466 | MGC111960     |
| A_15_P574142    | 514.2937  | 1122.541  | 1.457 | LOC565141     |
| A_15_P571557    | 581.2514  | 1293.976  | 1.429 | entgLOC799508 |
| A_15_P370160    | 651.6943  | 1508.844  | 1.374 |               |
| A_15_P359895    | 744.7673  | 1731.351  | 1.368 |               |
| A_15_P520127    | 521.3237  | 1303.492  | 1.272 |               |
| A_15_P536267    | 876.2537  | 2215.968  | 1.258 |               |
| A_15_P109273    | 602.846   | 1545.618  | 1.241 | MGC73262      |
| A_15_P354405    | 617.2427  | 1665.014  | 1.179 |               |
| A_15_P390895    | 563.4147  | 1527.451  | 1.173 |               |
| A_15_P335940    | 1784.431  | 4950.619  | 1.146 |               |
| A_15_P546442    | 1158.545  | 3428.299  | 1.075 | LOC798405     |
| A_15_P372475    | 520.2233  | 1573.787  | 1.051 |               |
| A_15_P390815    | 556.2657  | 1756.853  | 1.007 |               |

---
